# Supplementary material for: Anti-α-Glucosidase, SAR Analysis, and Mechanism Investigation of Indolo[1,2-b]isoquinoline Derivatives
Source: MDPI journal article supplement (doi:10.3390/molecules28135282), 2023-07-07
Supplement: s1 [file s1]

## Supplementary File (NMR data)

# Anti- $\alpha$ -Glucosidase, SAR Analysis, and Mechanism Investigation of Indolo[1,2-b]isoquinoline Derivatives

Mengyue Li, Lin Li, Li Lu, Xuetao Xu \*, Jinhui Hu and Jin-Bao Peng \*

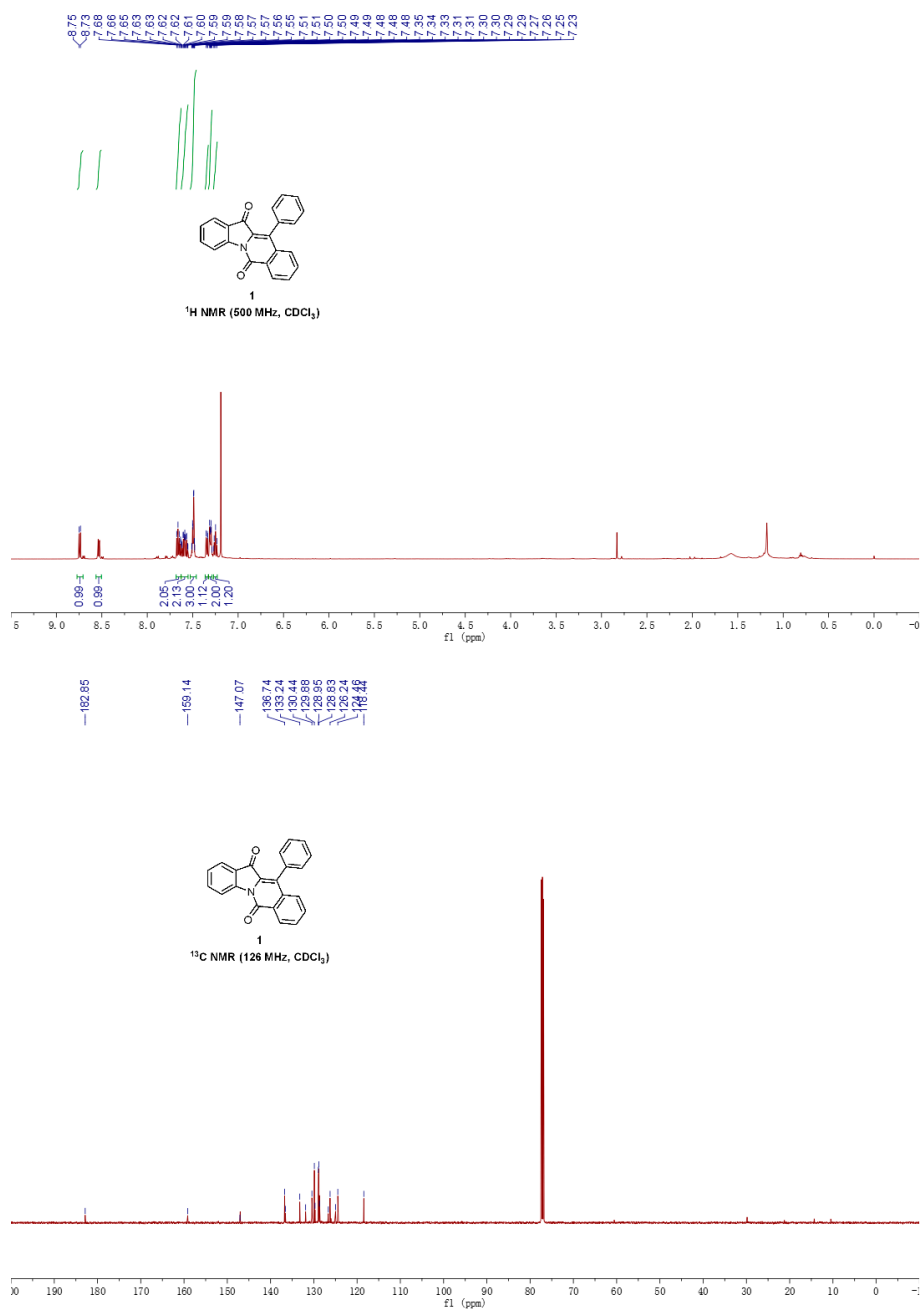

**2**

<sup>1</sup>H NMR (500 MHz, CDCl<sub>3</sub>)

**2**

<sup>13</sup>C NMR (126 MHz, CDCl<sub>3</sub>)

<sup>1</sup>H NMR and <sup>13</sup>C NMR data of compound **2**.

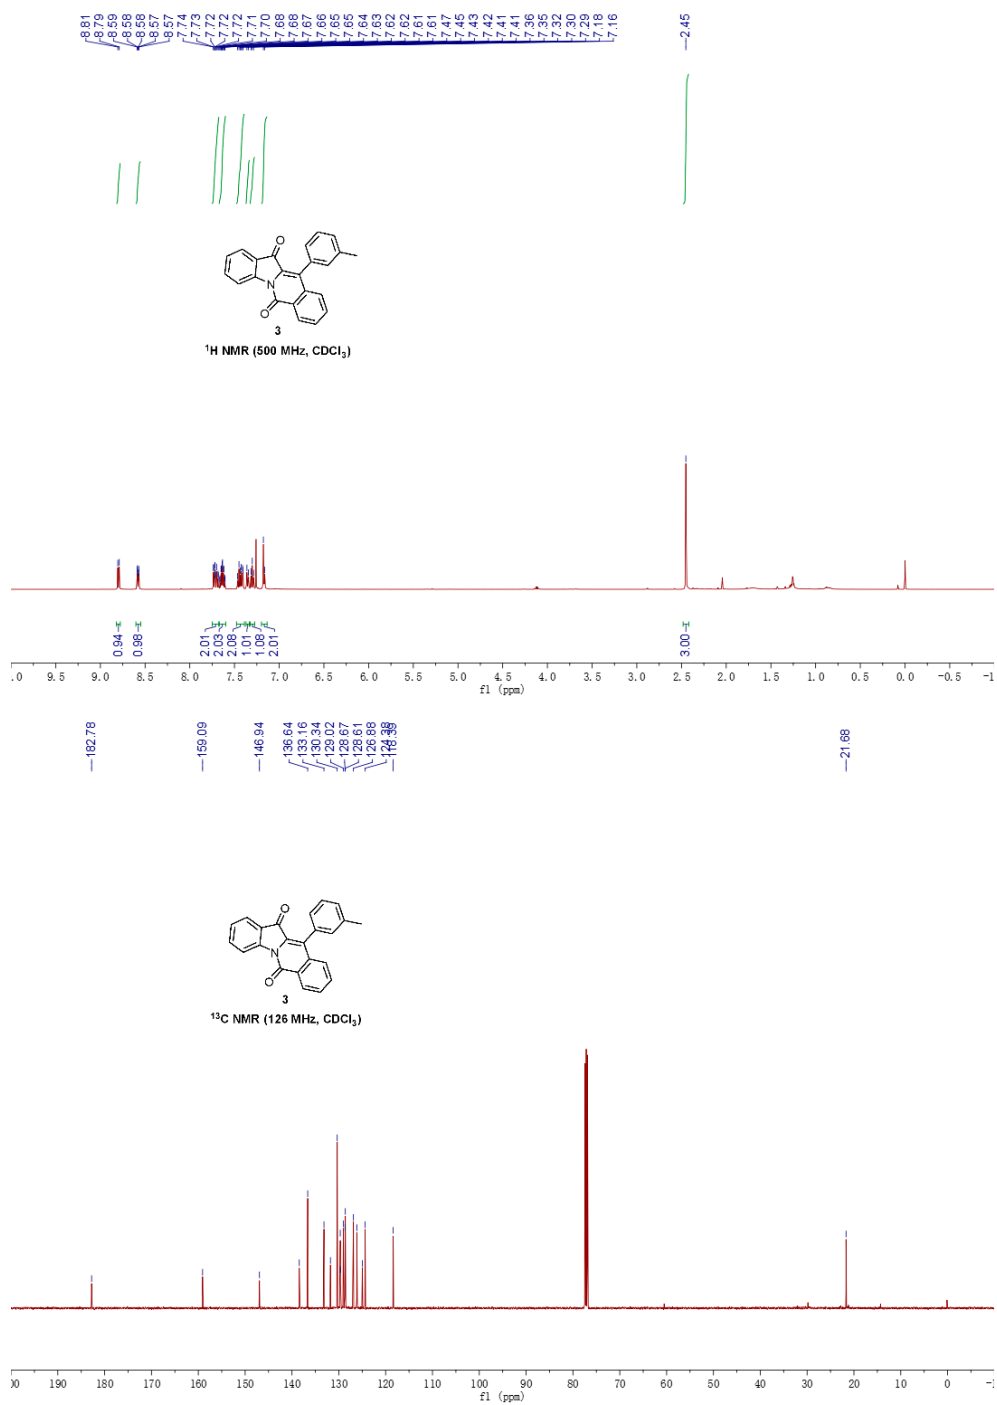

<sup>1</sup>H NMR and <sup>13</sup>C NMR data of compound **3**.

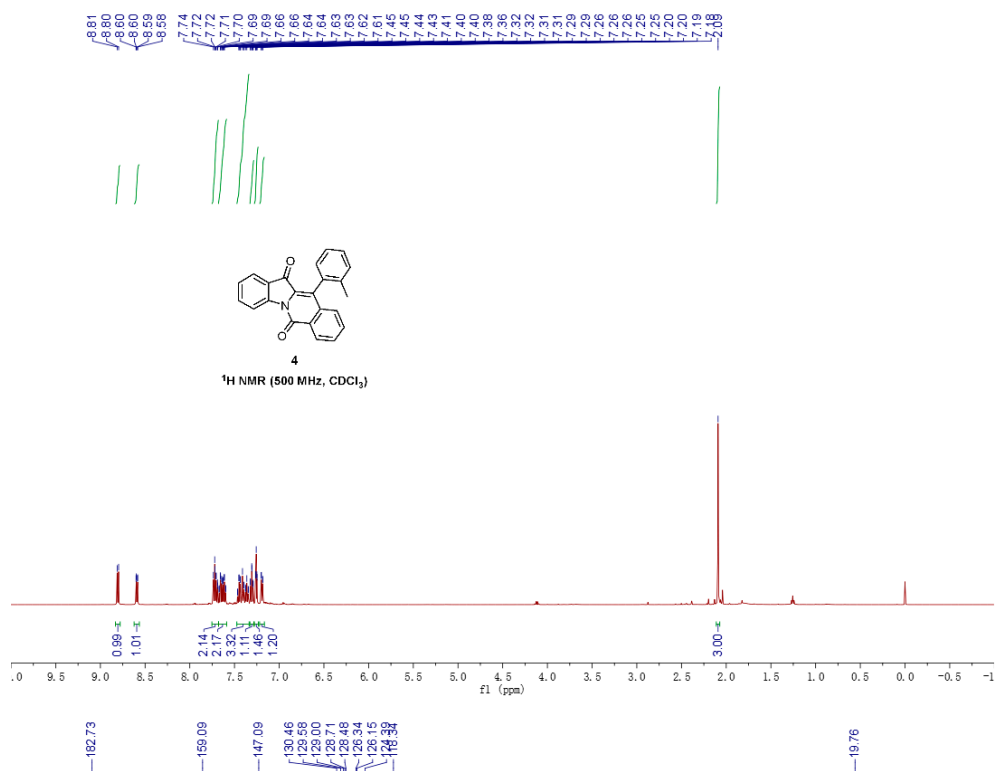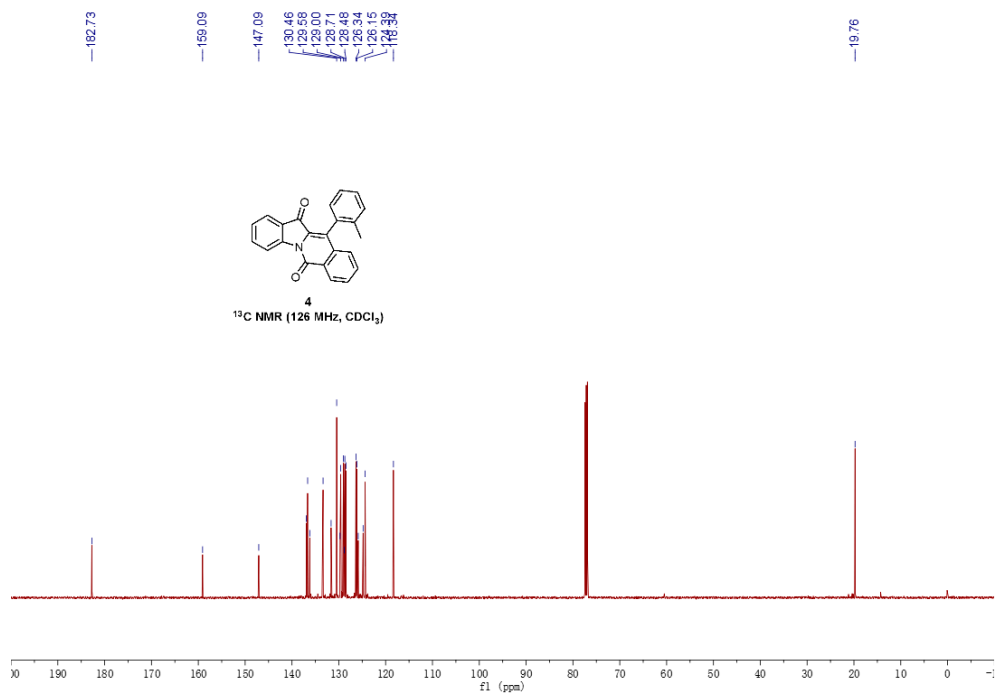

<sup>1</sup>H NMR and <sup>13</sup>C NMR data of compound 4.

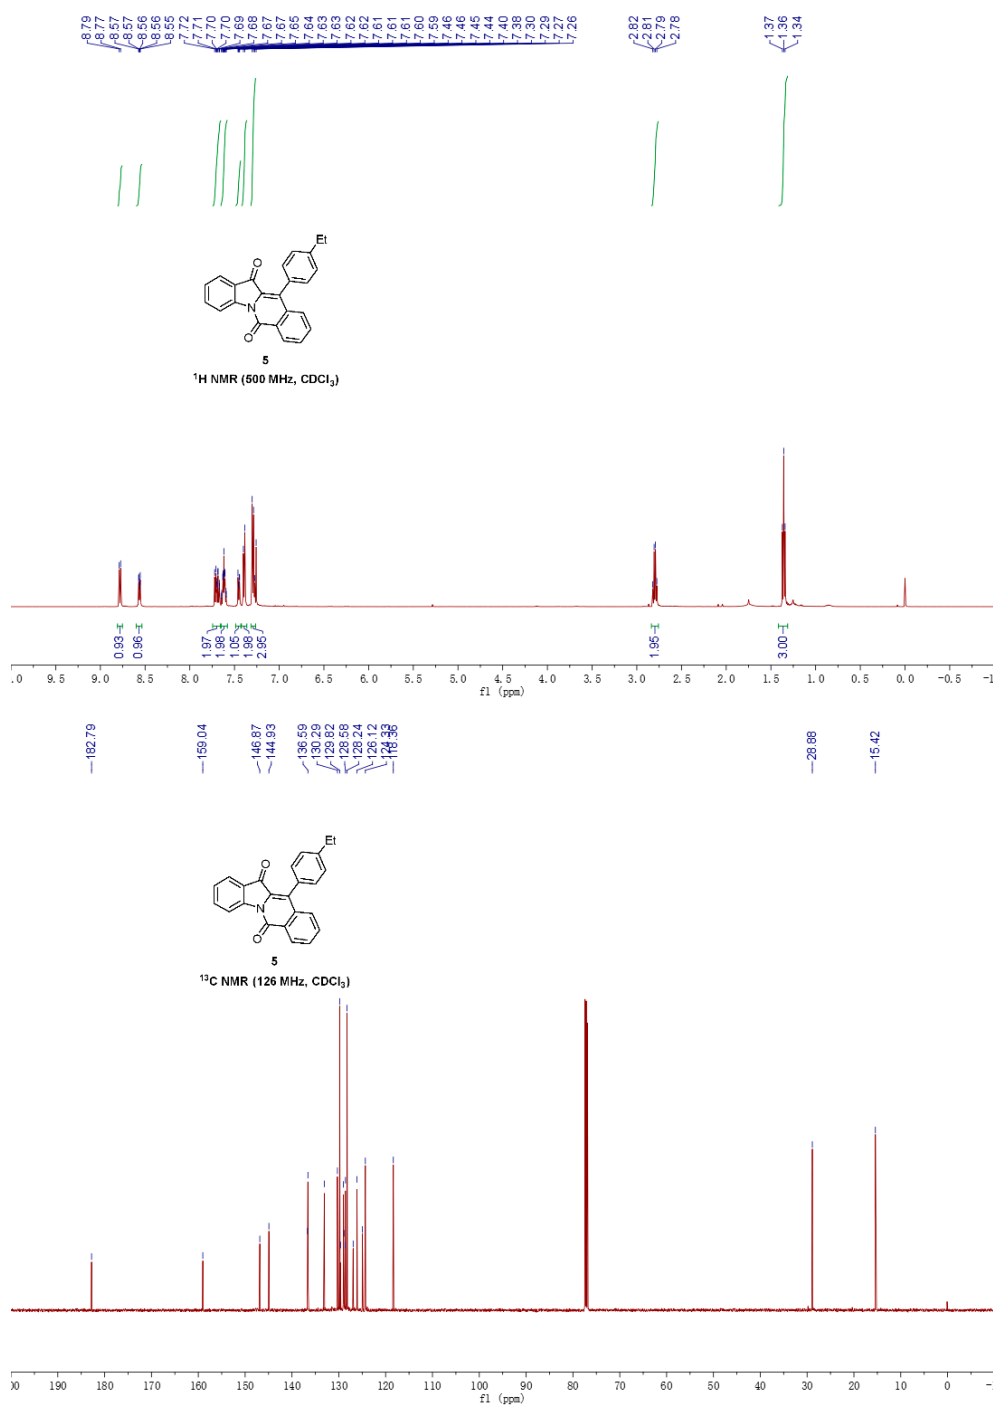

<sup>1</sup>H NMR and <sup>13</sup>C NMR data of compound **5**.

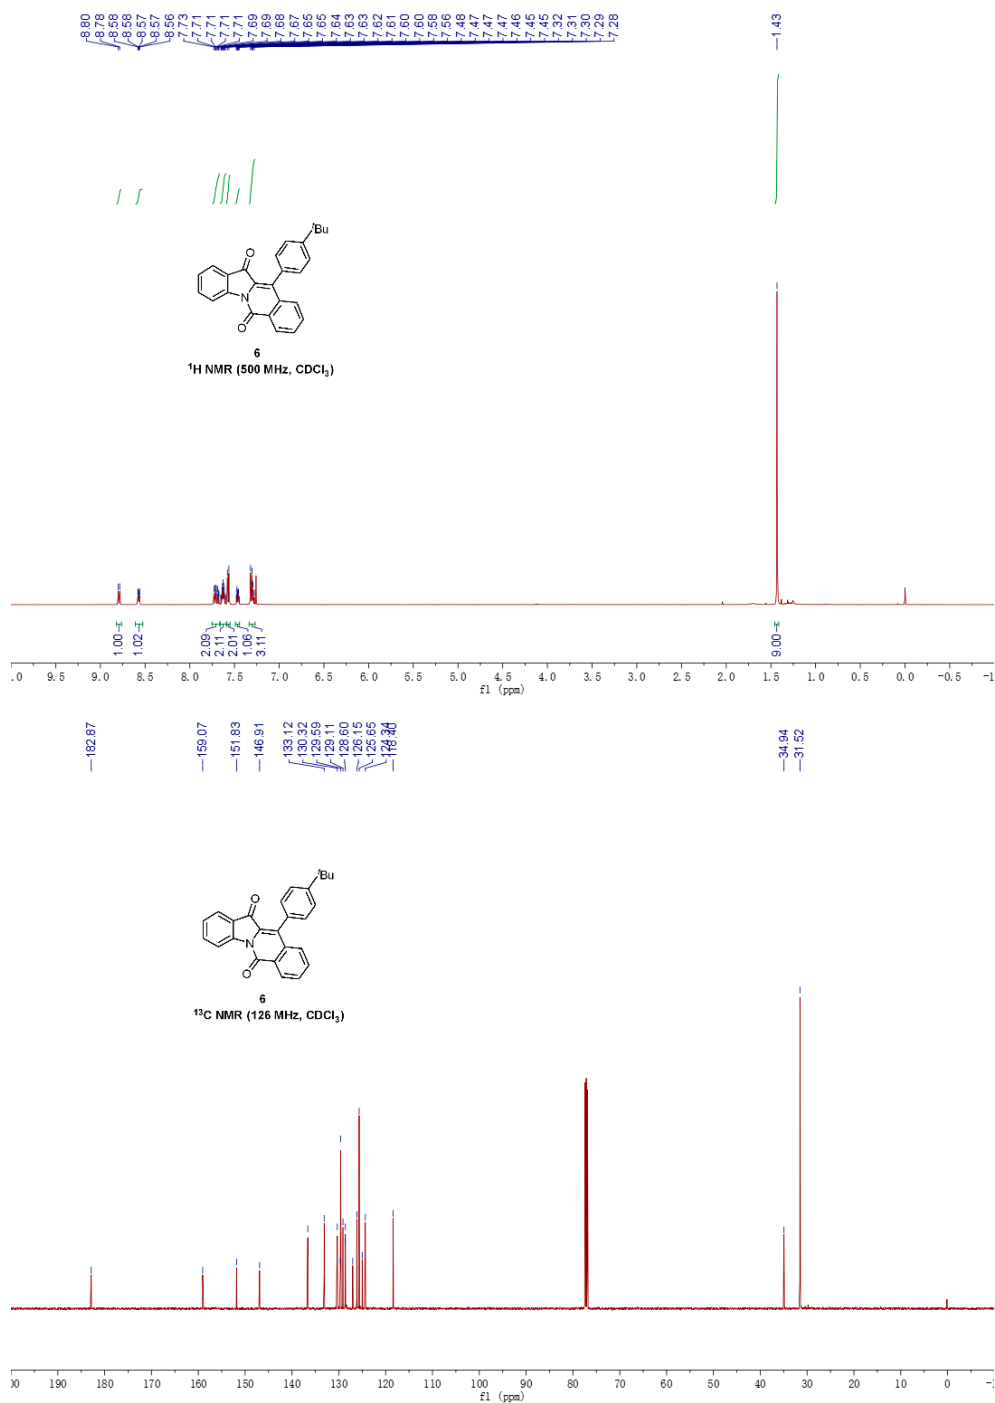

<sup>1</sup>H NMR and <sup>13</sup>C NMR data of compound **6**.

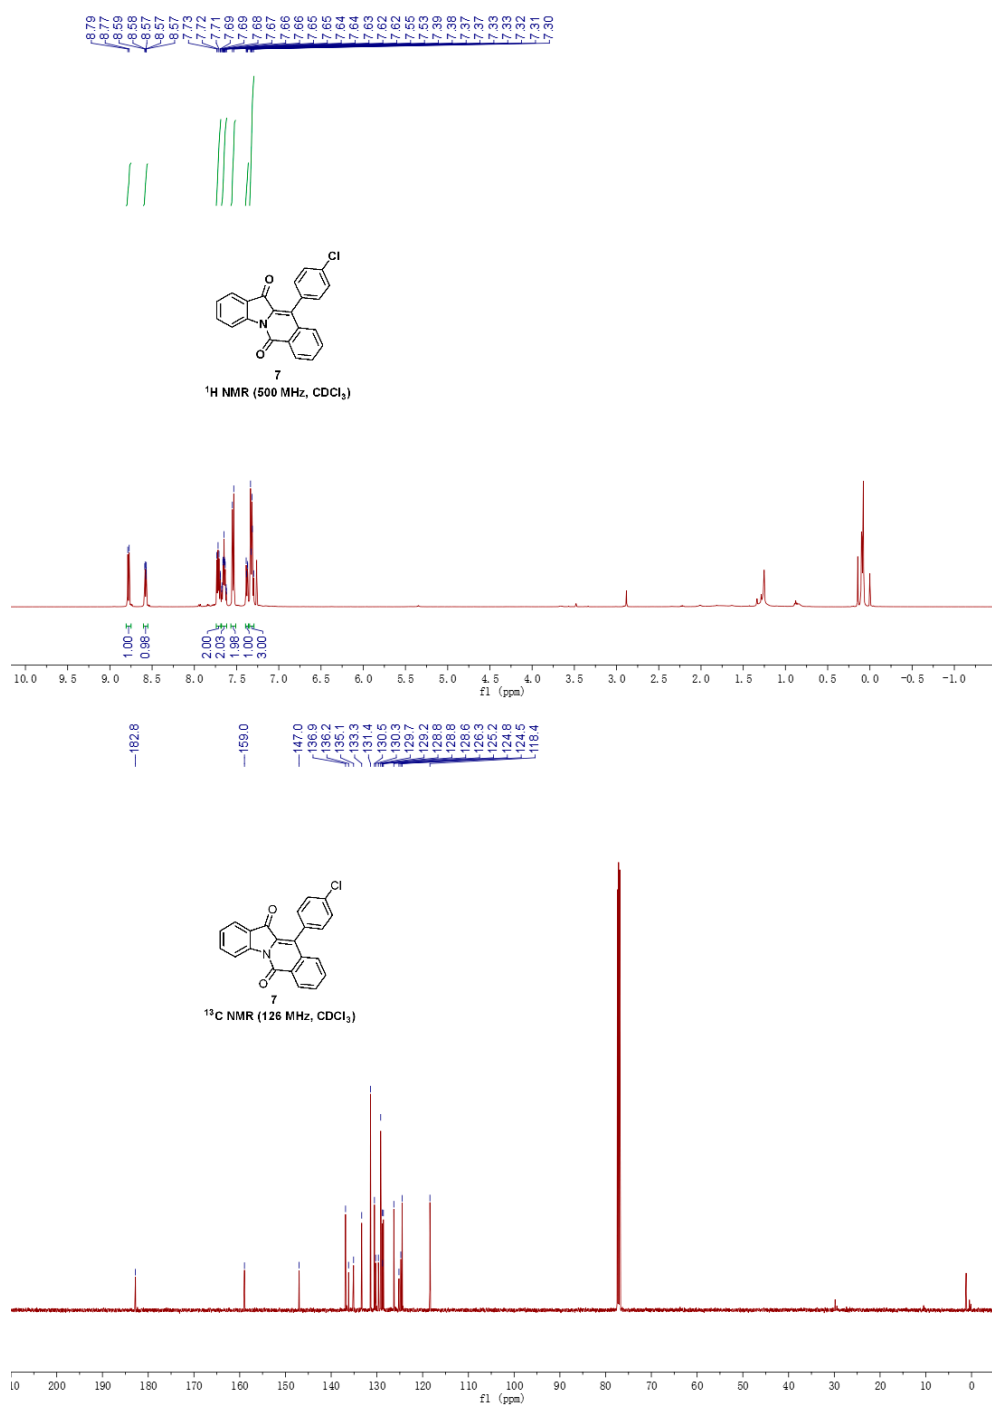

<sup>1</sup>H NMR and <sup>13</sup>C NMR data of compound 7.

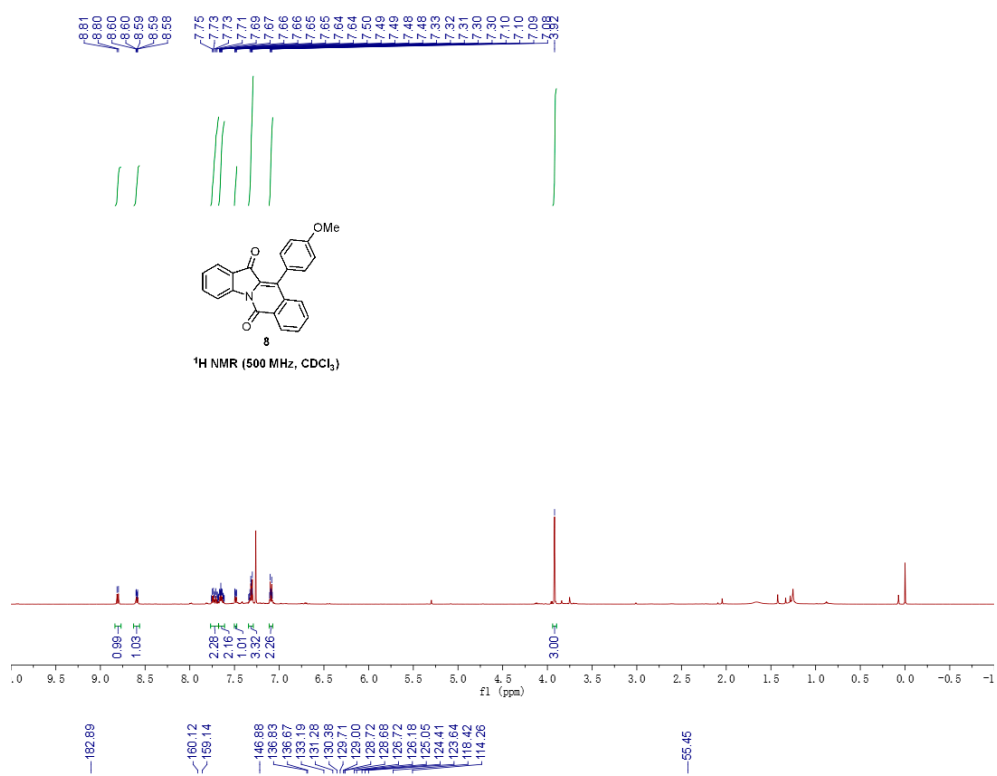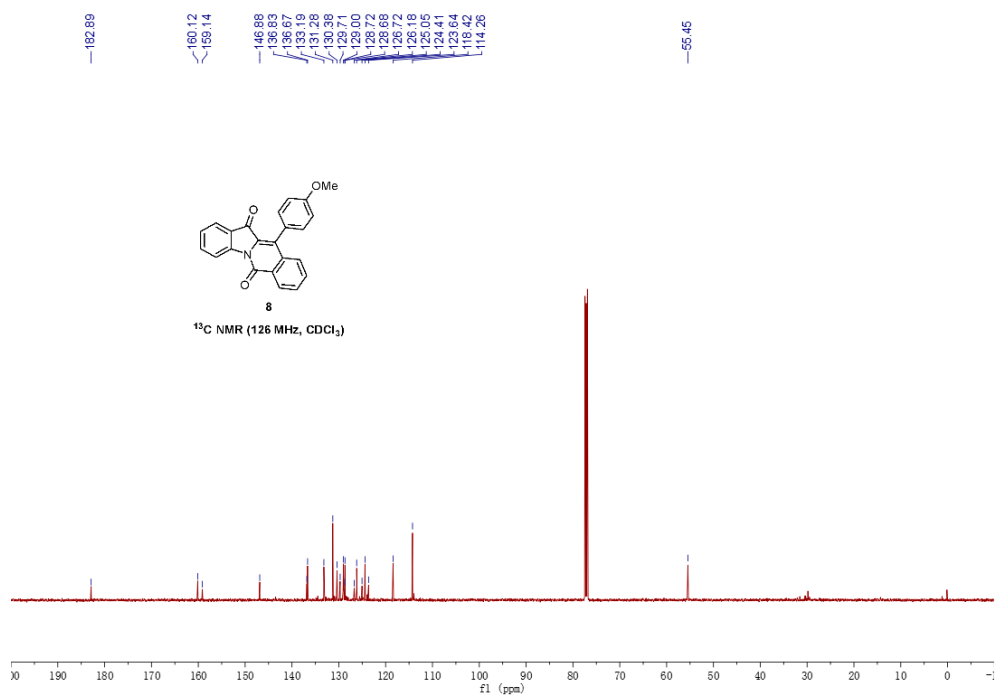

$^1\text{H}$  NMR and  $^{13}\text{C}$  NMR data of compound **8**.



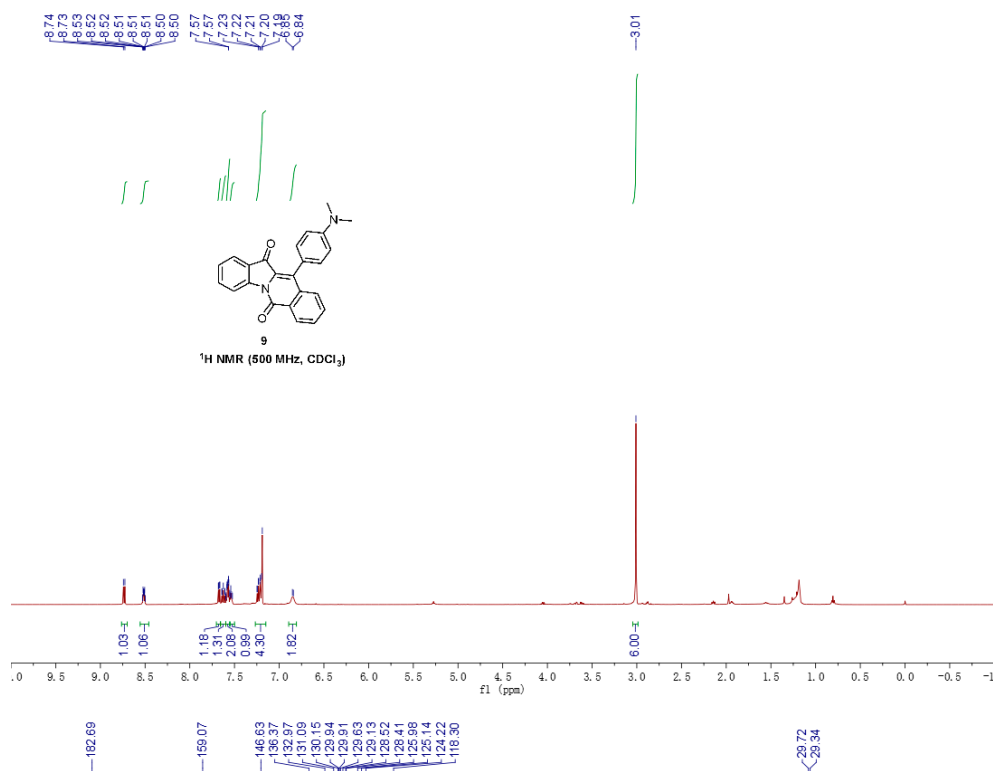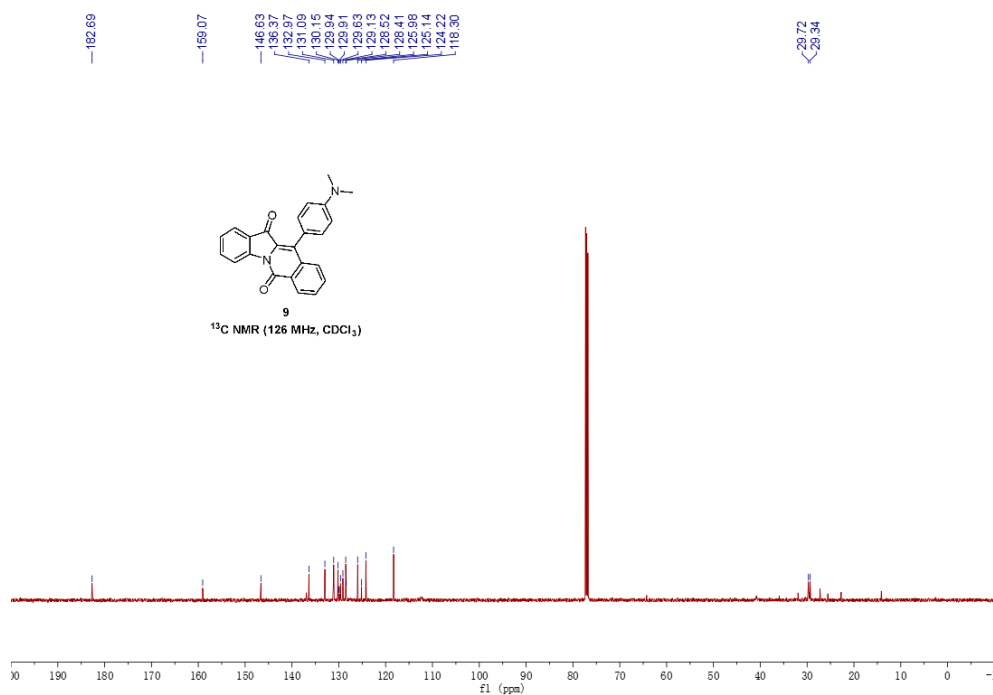

<sup>1</sup>H NMR and <sup>13</sup>C NMR data of compound **9**.

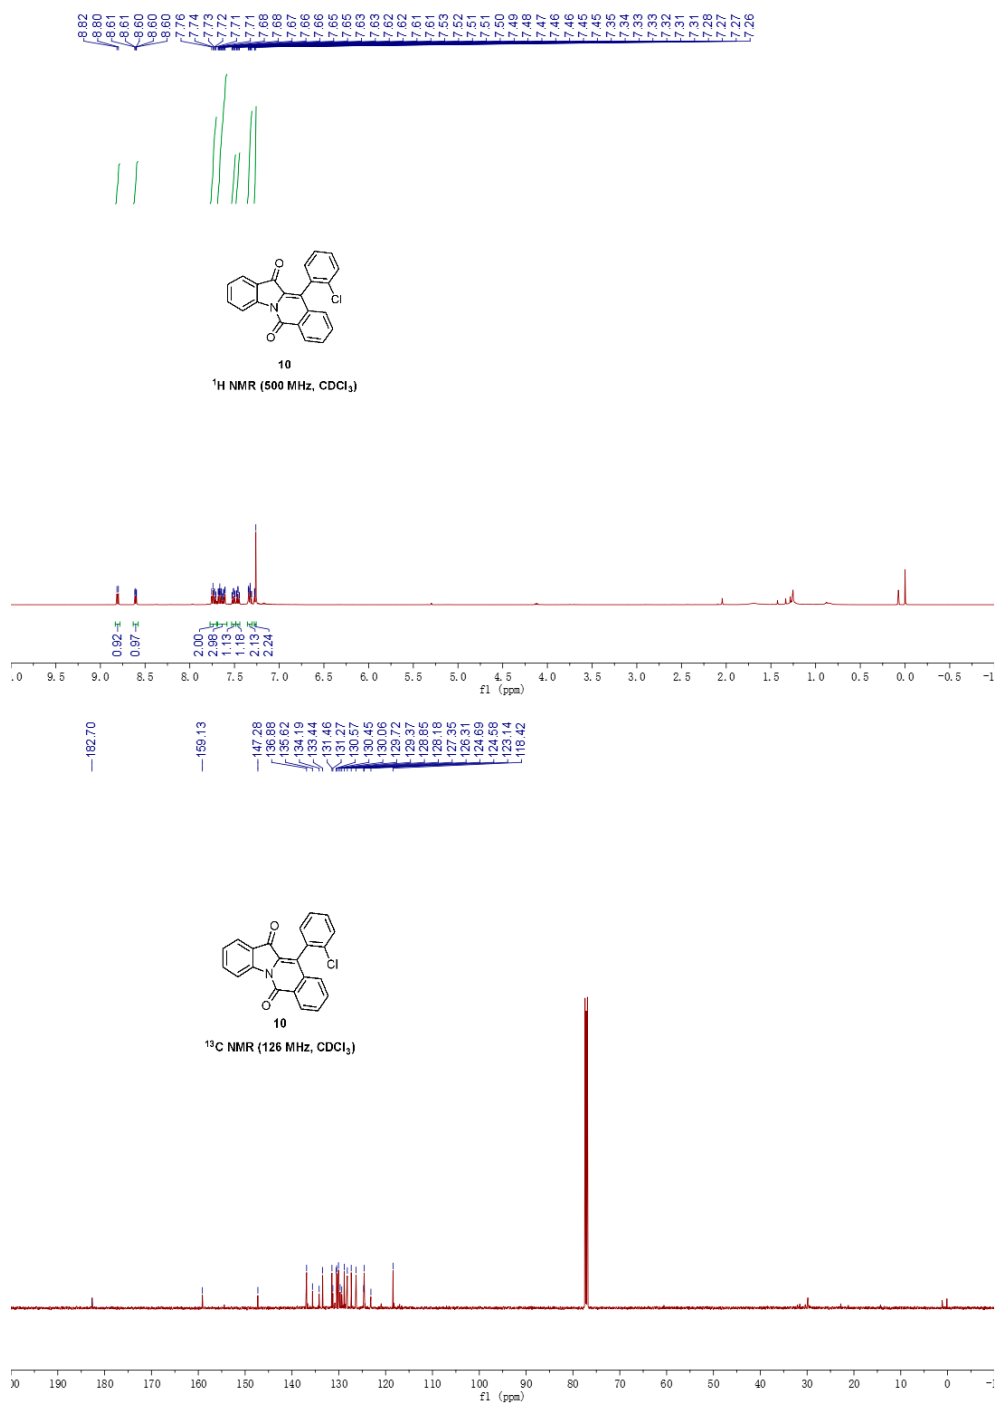

<sup>1</sup>H NMR and <sup>13</sup>C NMR data of compound **10**.

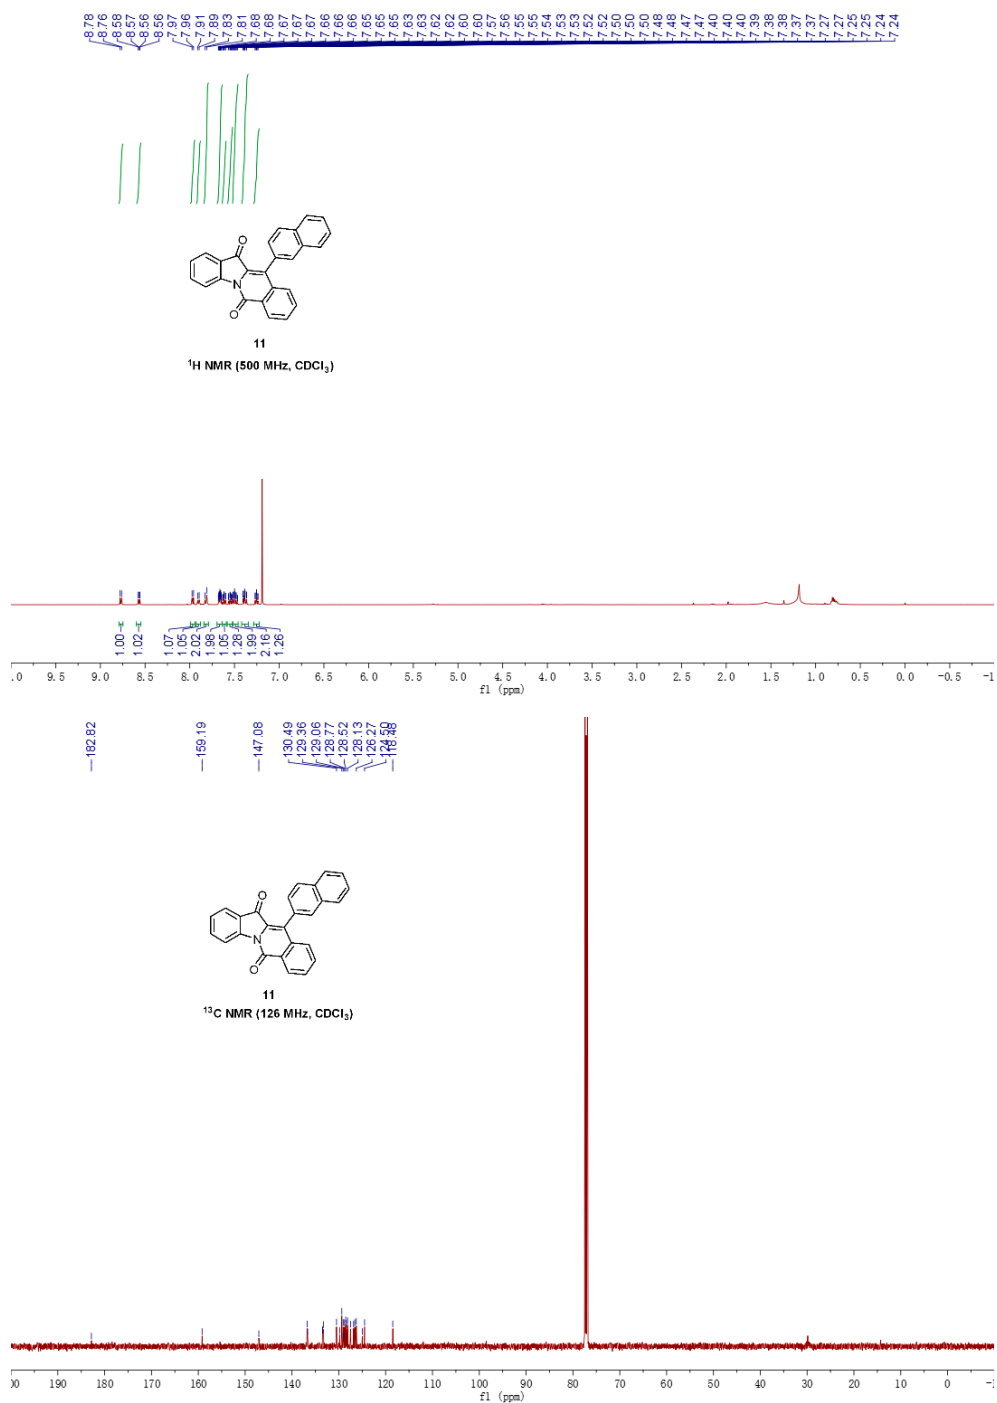

<sup>1</sup>H NMR and <sup>13</sup>C NMR data of compound **11**.

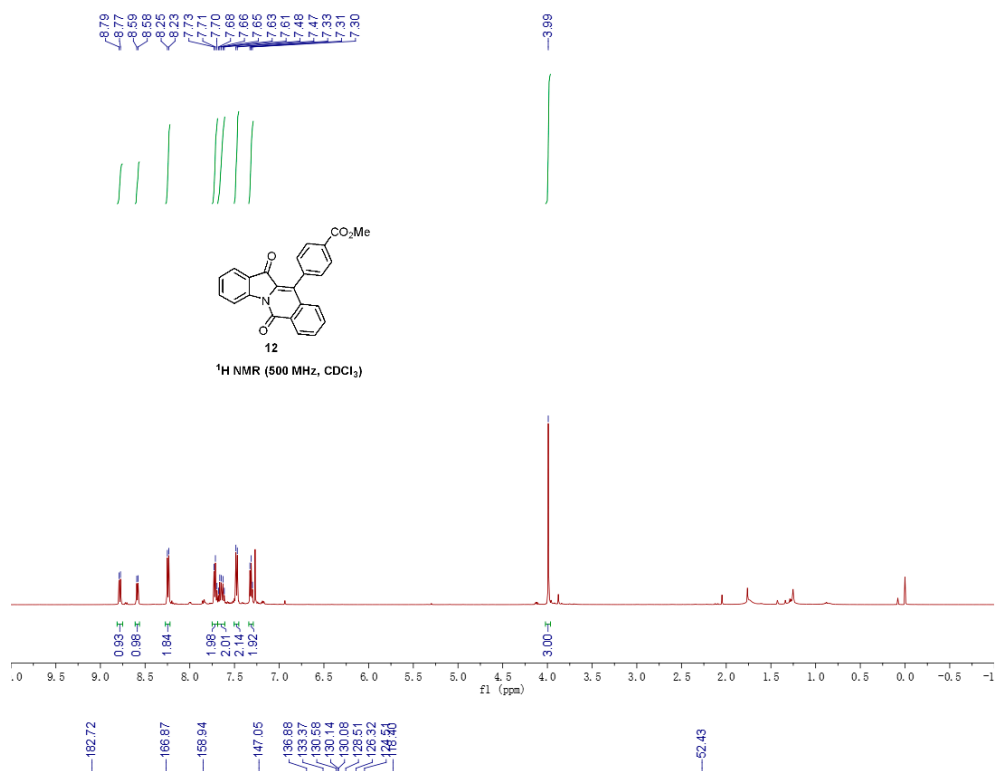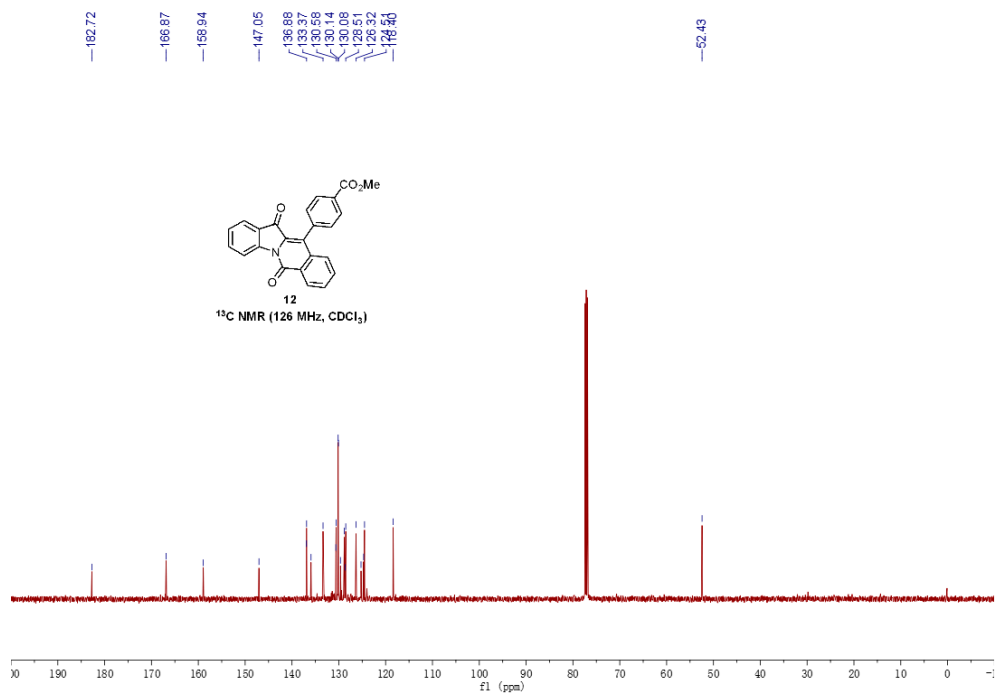

<sup>1</sup>H NMR and <sup>13</sup>C NMR data of compound **12**.

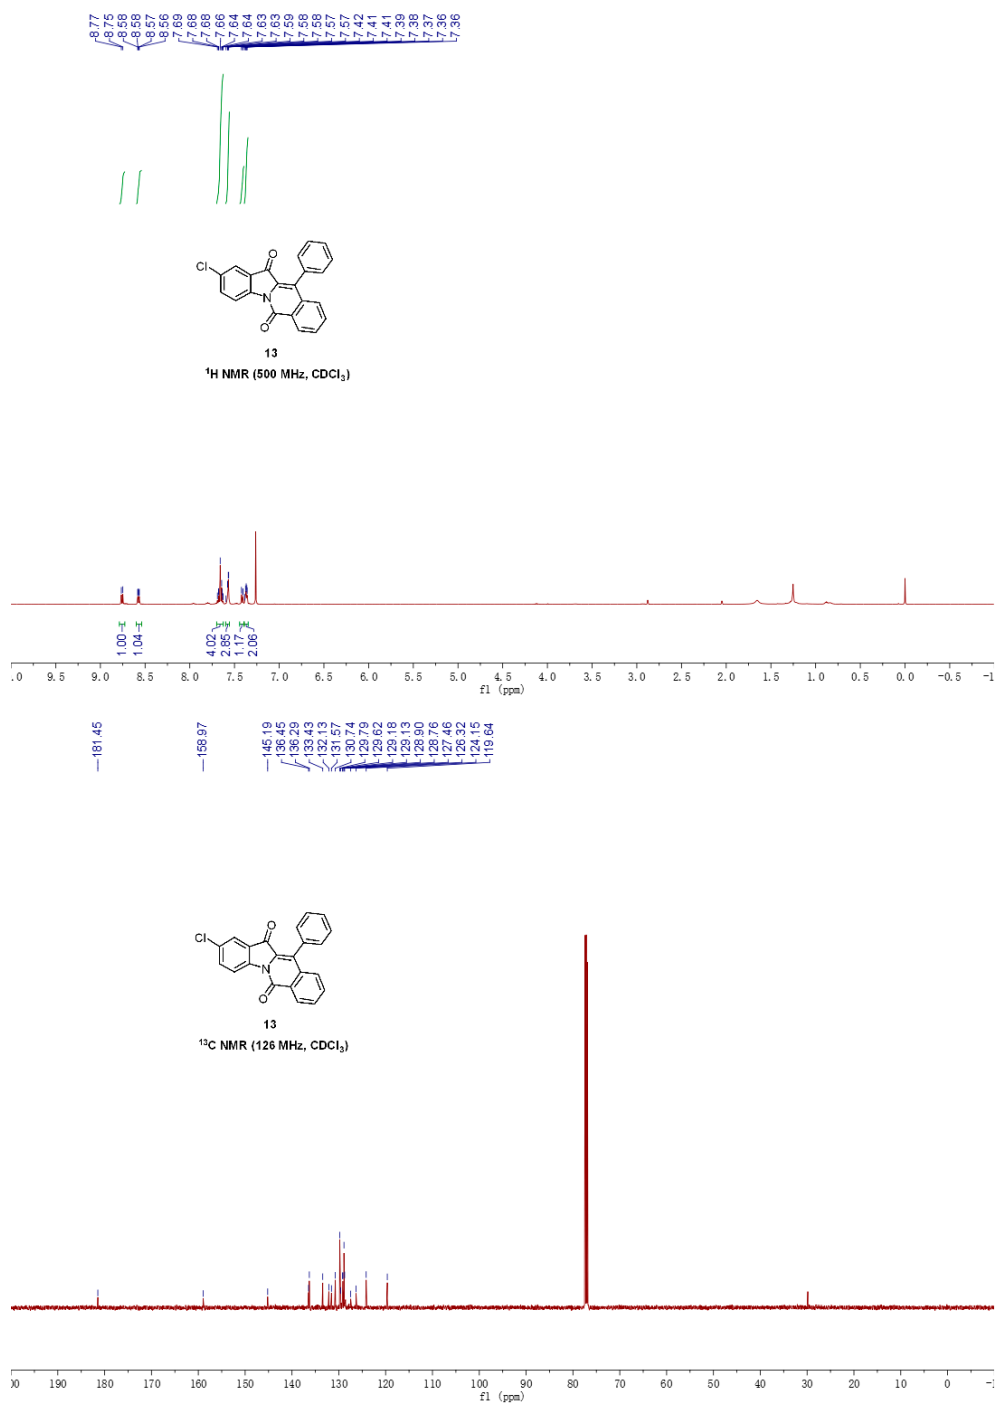

<sup>1</sup>H NMR and <sup>13</sup>C NMR data of compound **13**.

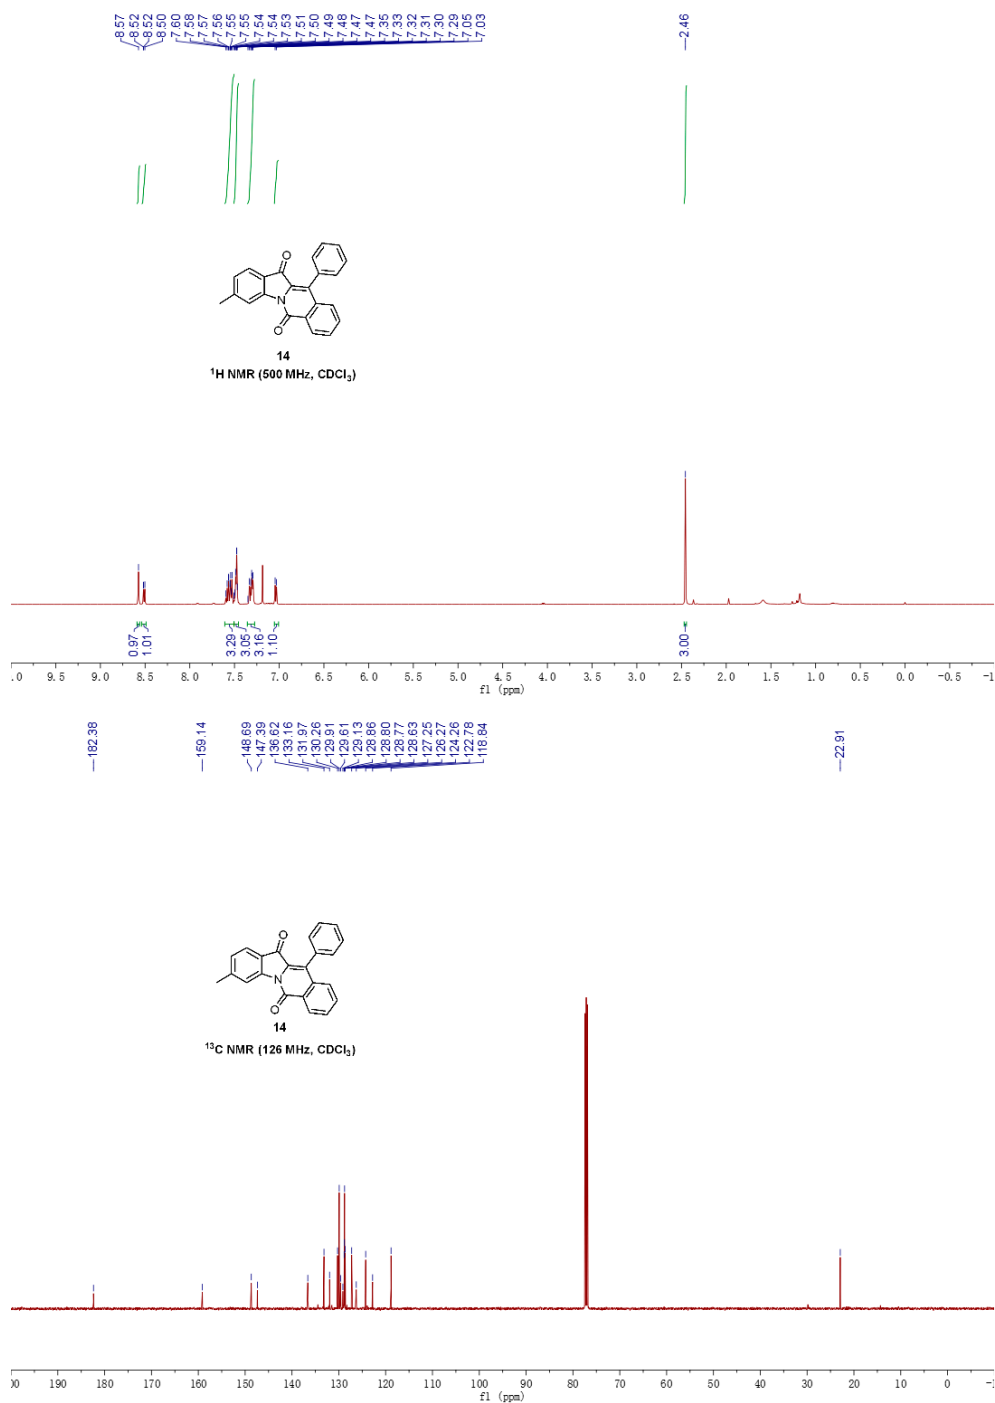

<sup>1</sup>H NMR and <sup>13</sup>C NMR data of compound **14**.

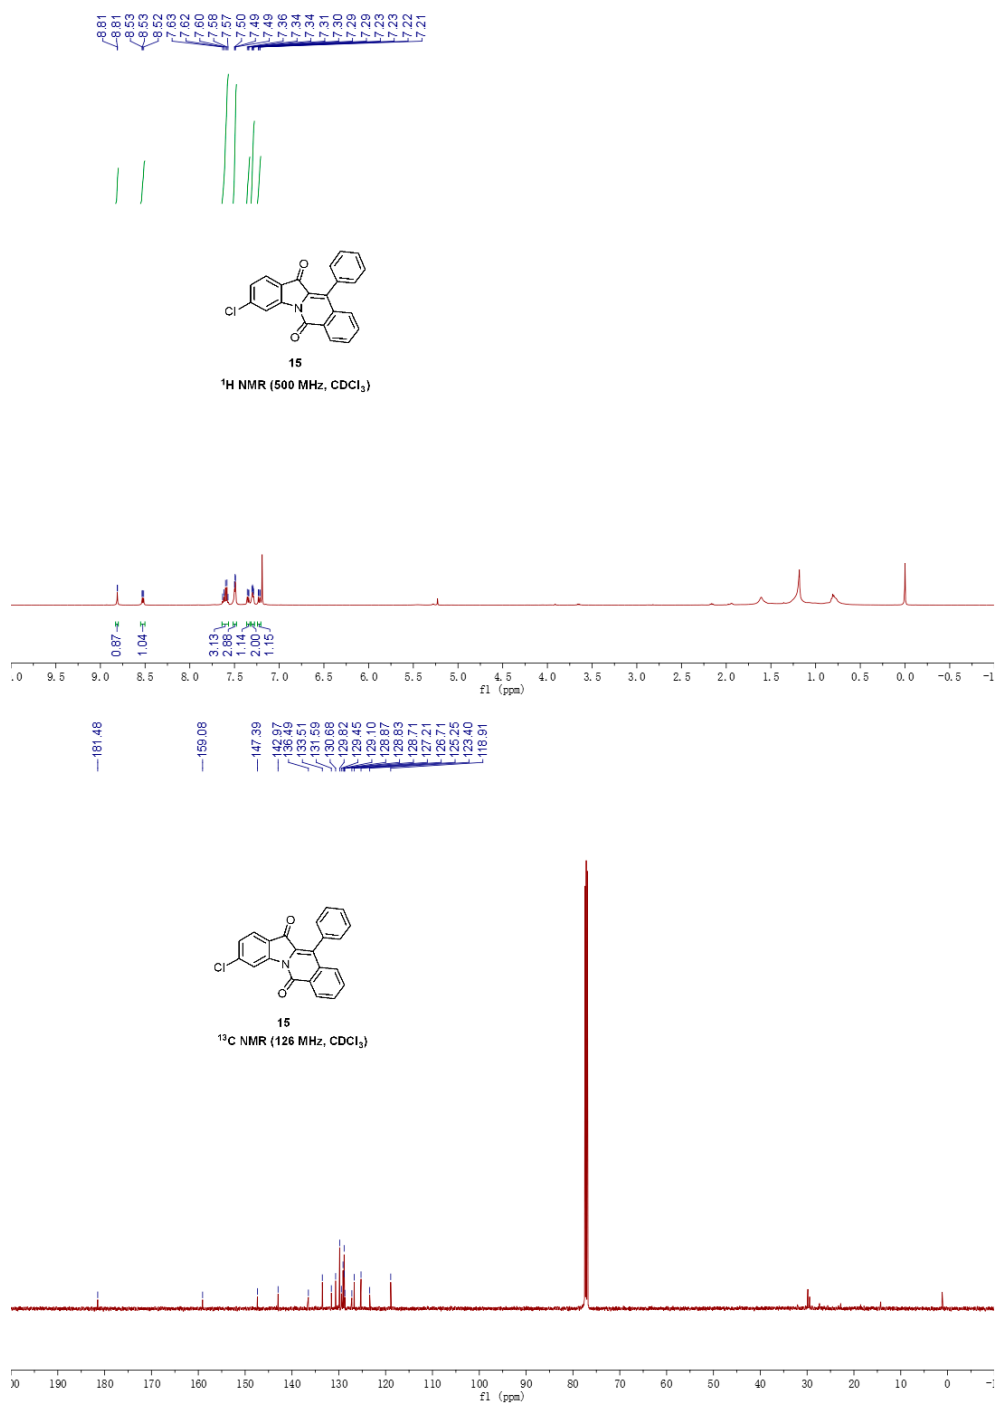

<sup>1</sup>H NMR and <sup>13</sup>C NMR data of compound **15**.

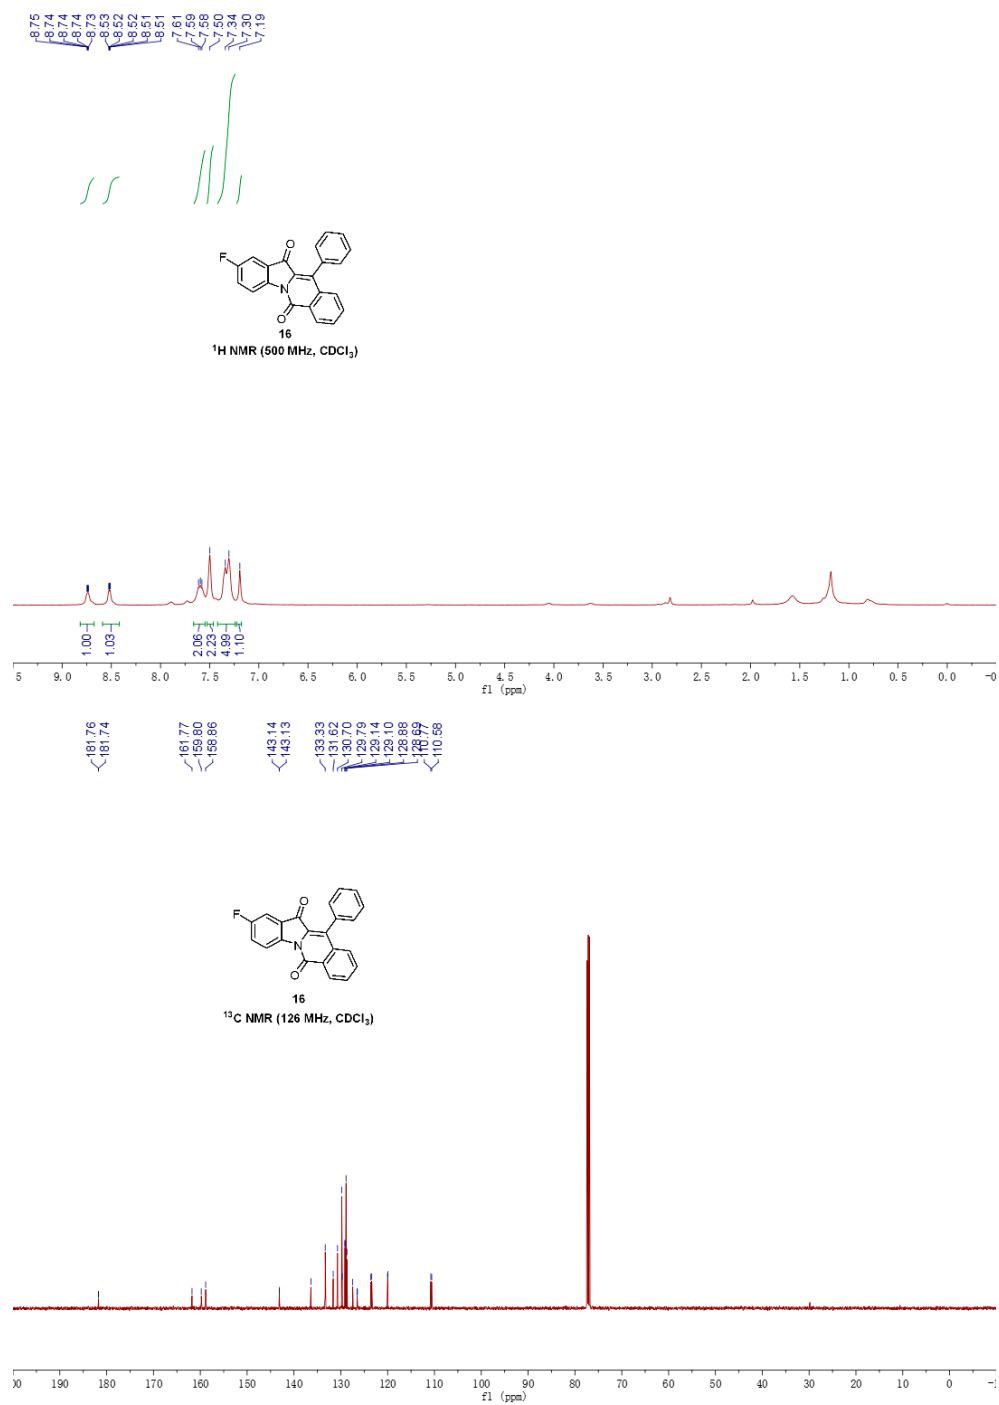

<sup>1</sup>H NMR and <sup>13</sup>C NMR data of compound **16**.



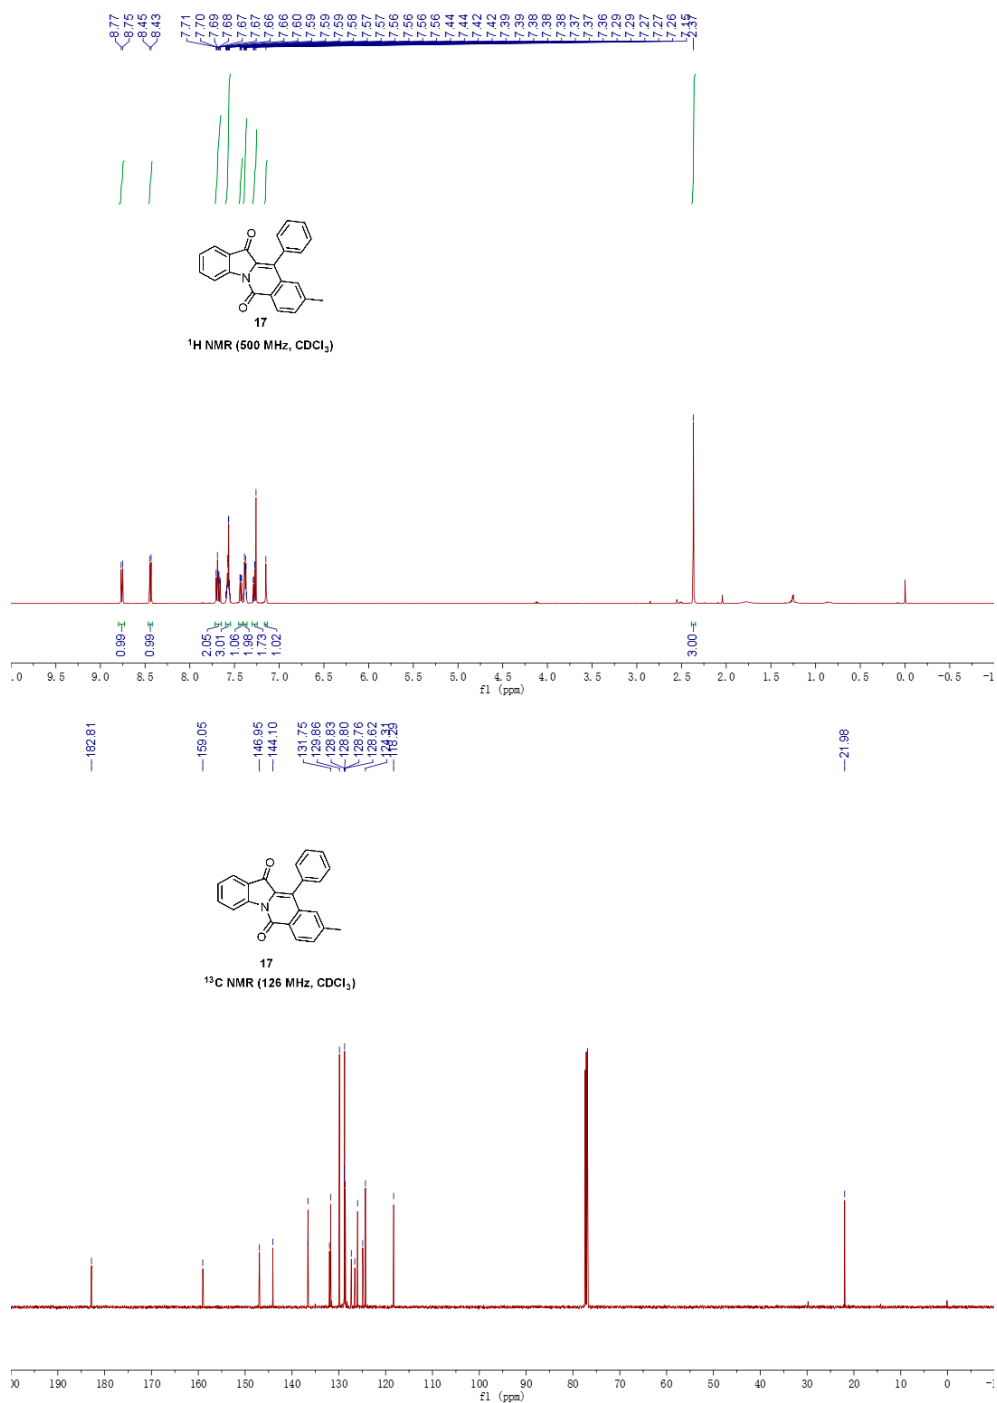

<sup>1</sup>H NMR and <sup>13</sup>C NMR data of compound **17**.

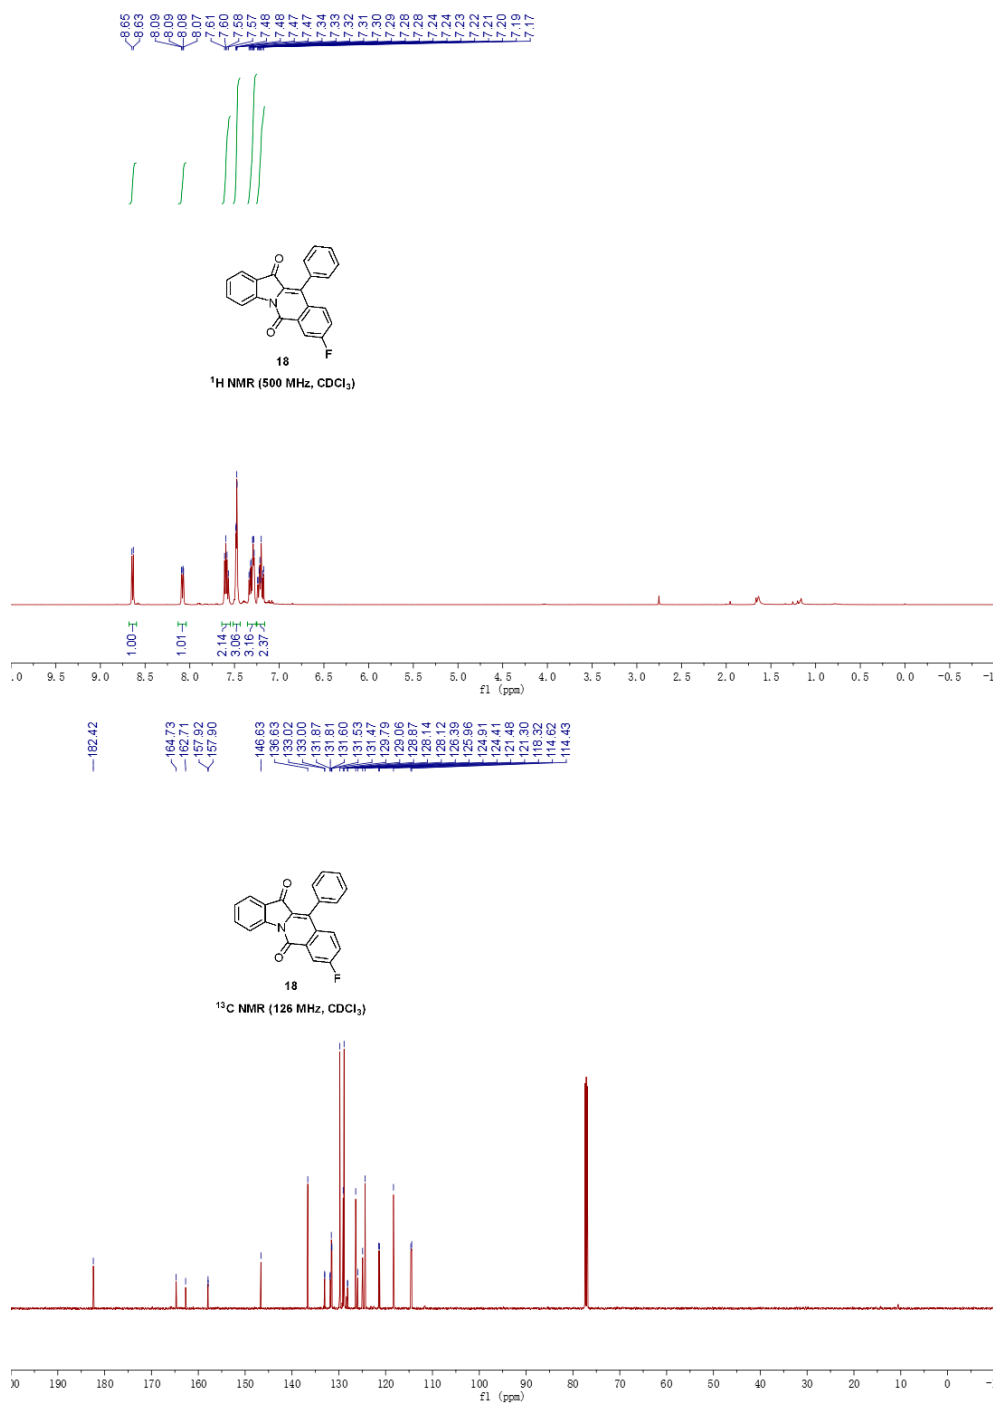

**<sup>1</sup>H NMR and <sup>13</sup>C NMR data of compound **18**.**

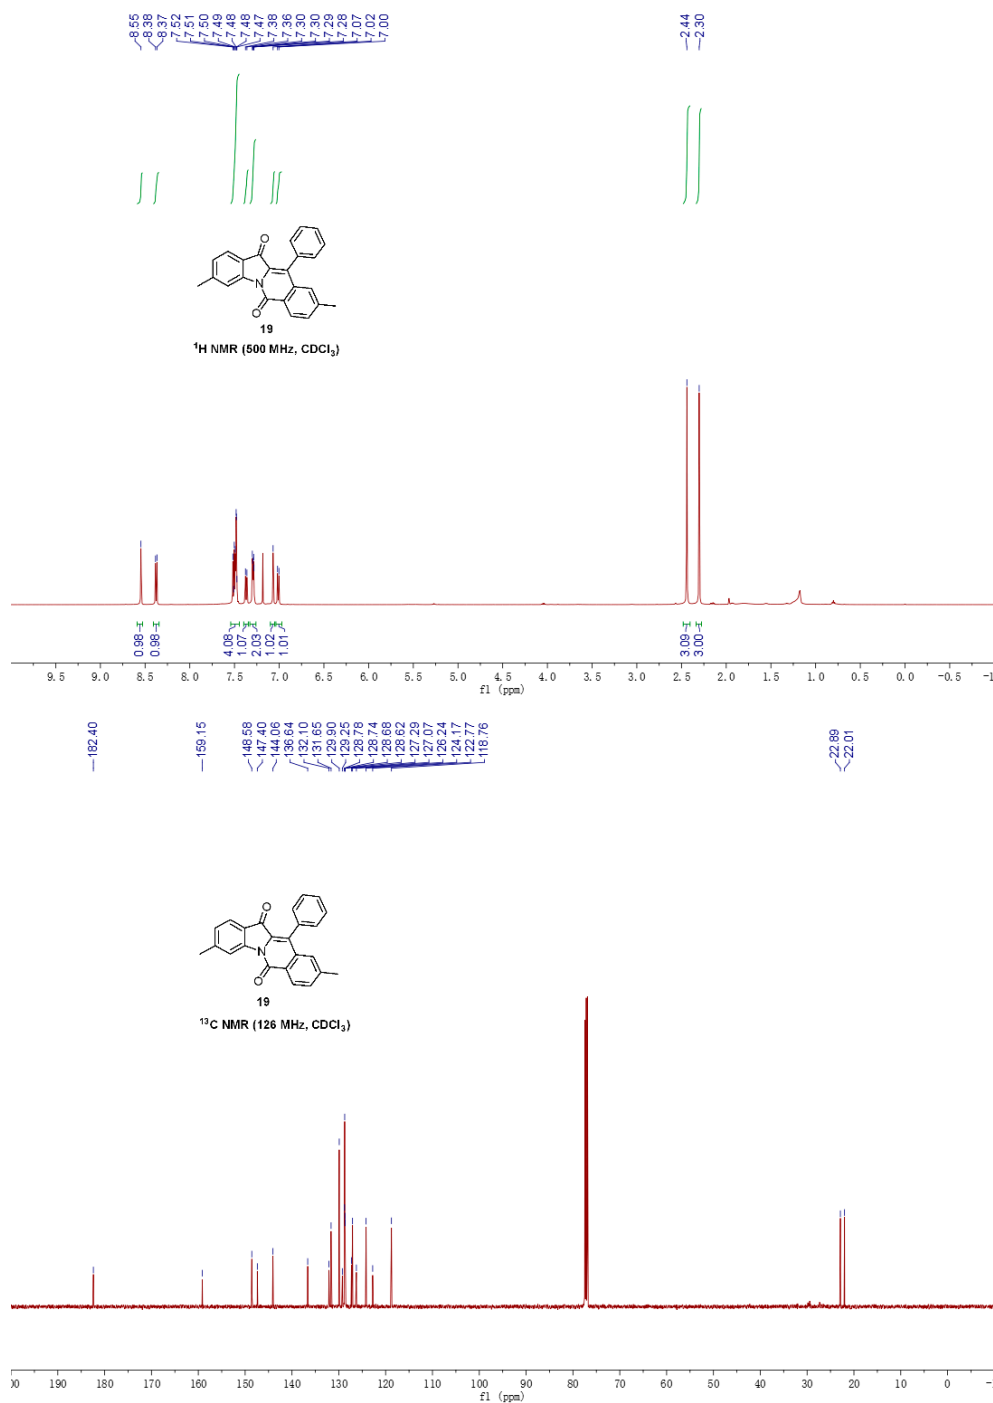

<sup>1</sup>H NMR and <sup>13</sup>C NMR data of compound **19**.

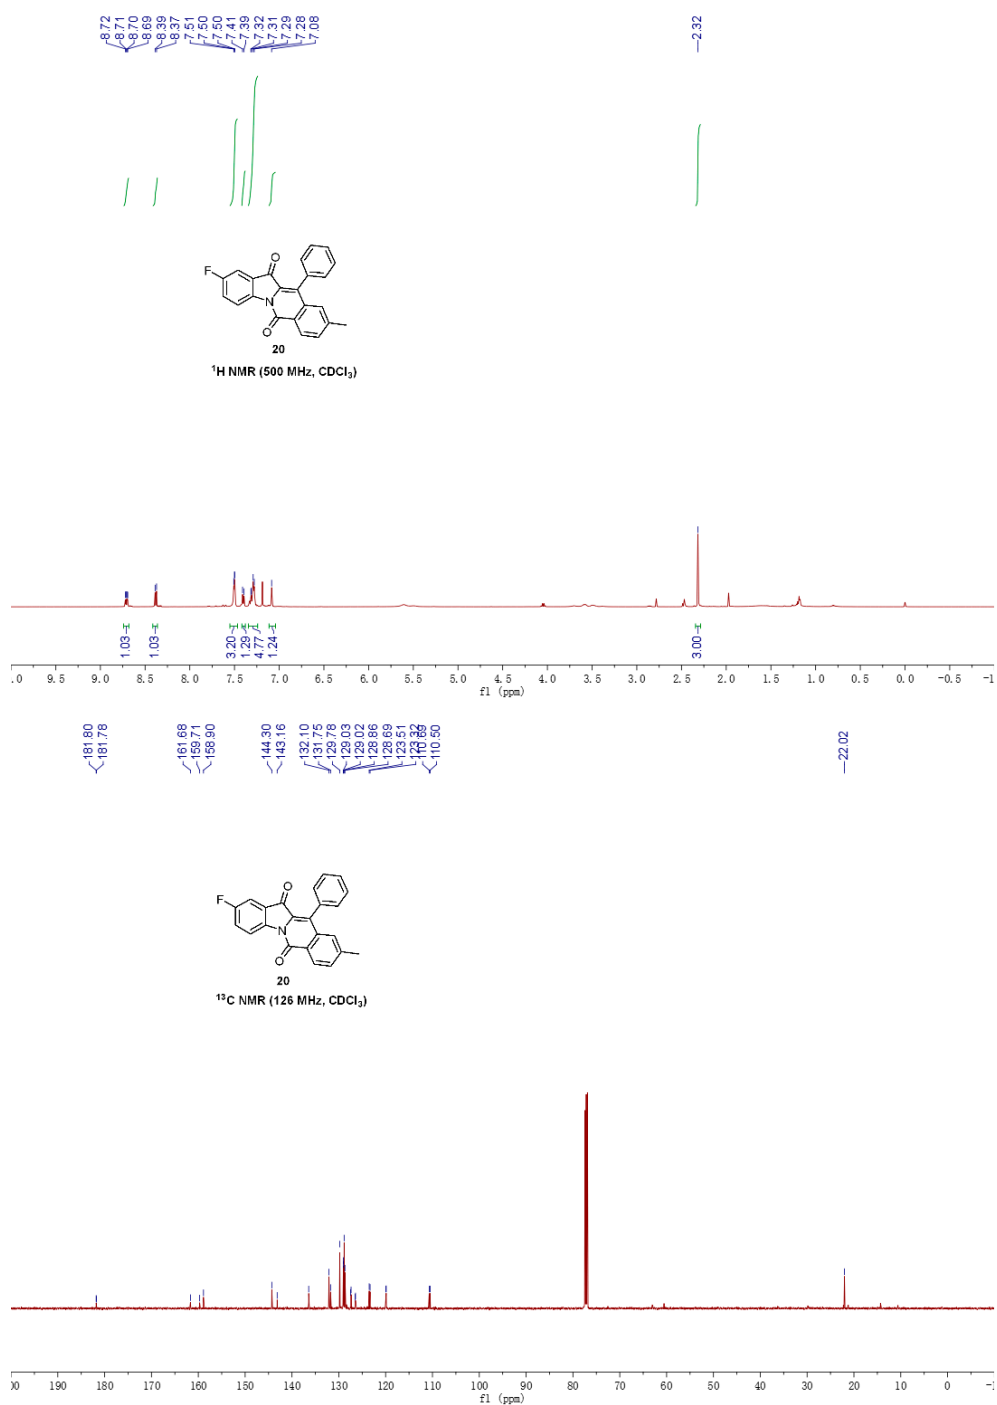

<sup>1</sup>H NMR and <sup>13</sup>C NMR data of compound **20**.
